# Supplementary material
Source: PubMed Central journal article supplement (PMC3242513)

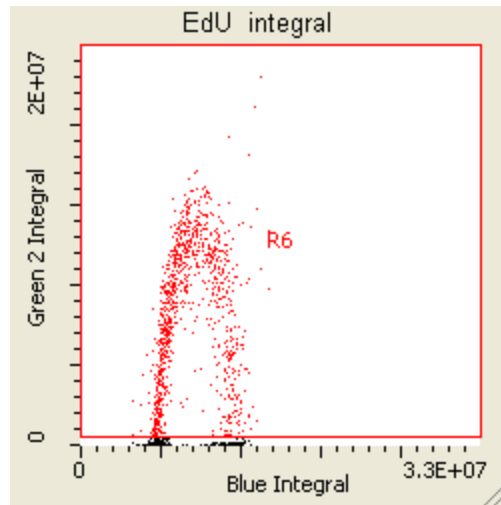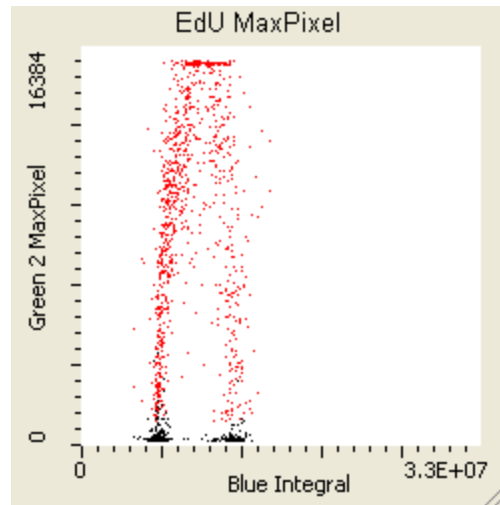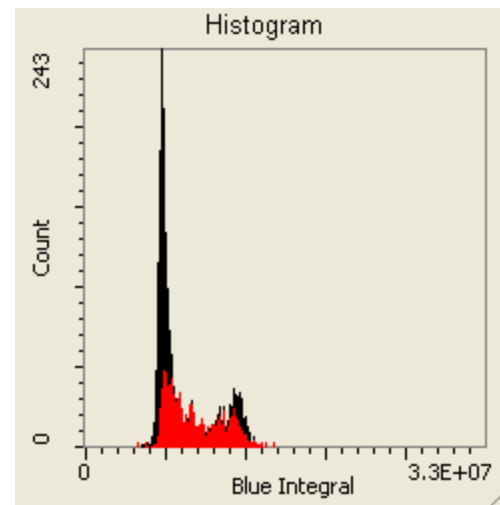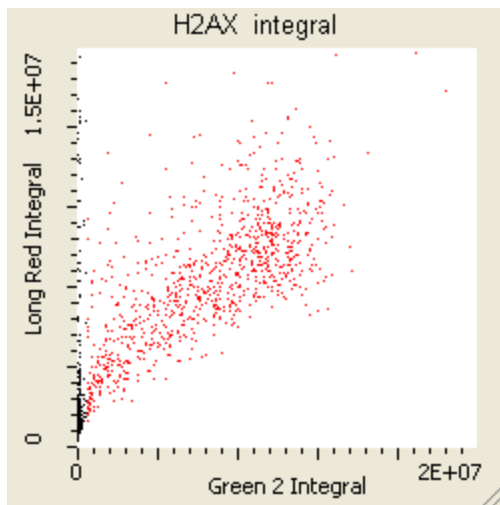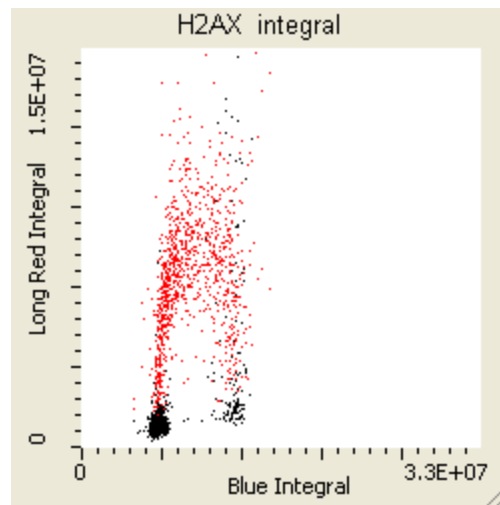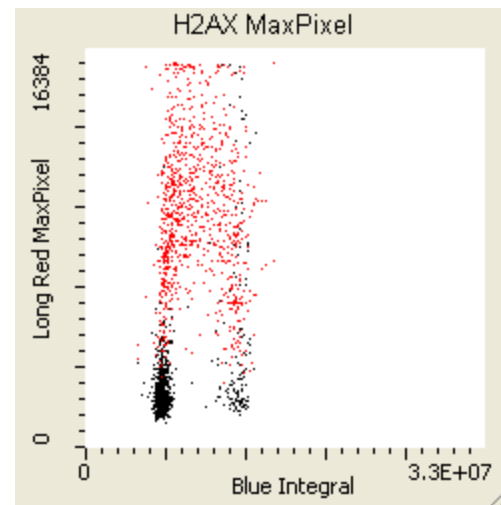

A549 EdU+camptothecin EdU-H2AX

Raw data, transferred to .ppt

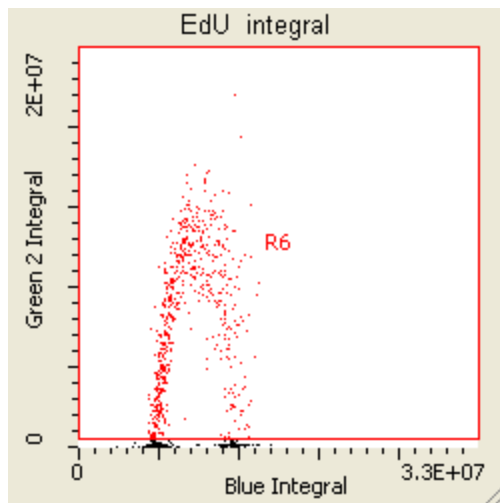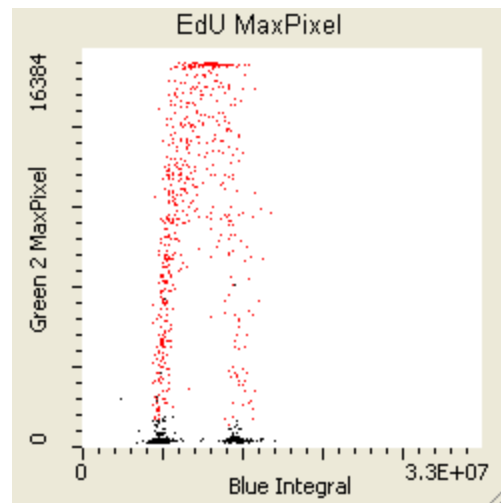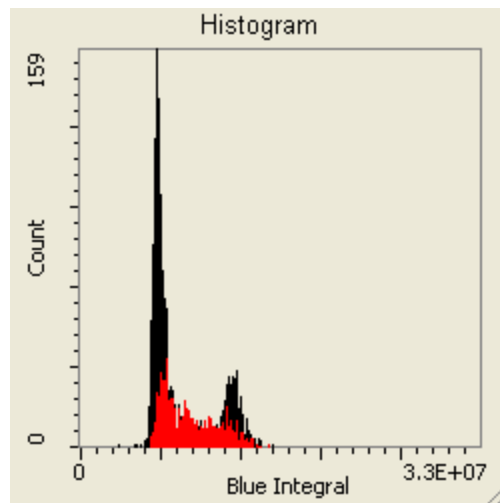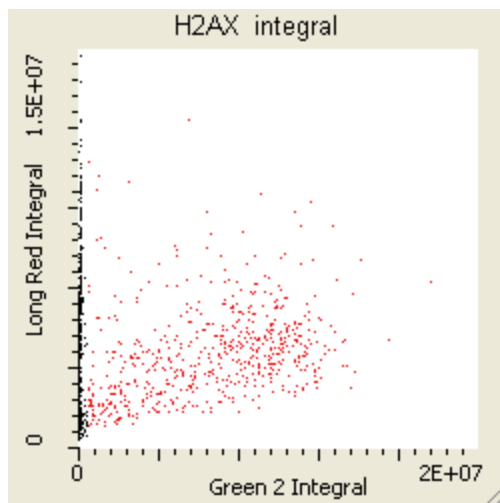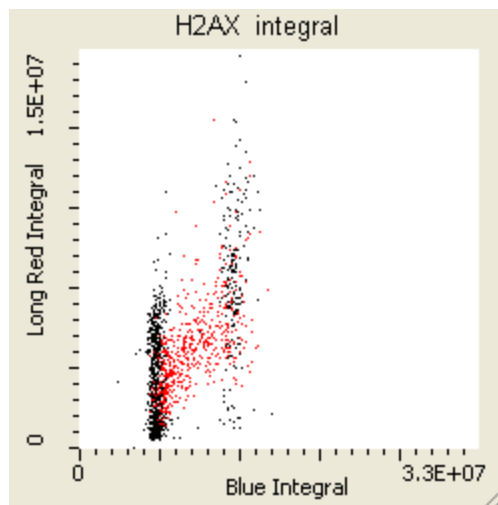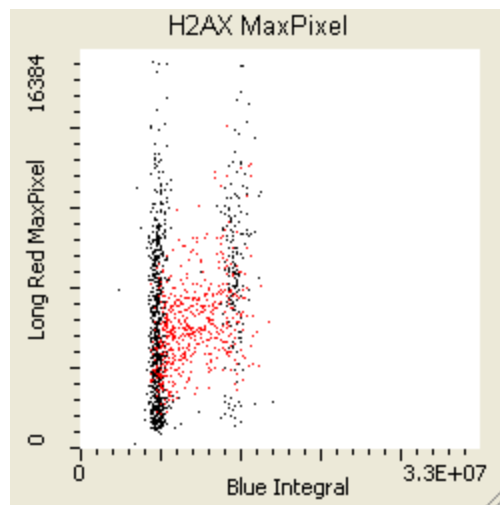

A549 EdU+etoposide EdU-H2AX

Supplement: NIHMS342333-supplement-Suppl__02.pdf [file NIHMS342333-supplement-Suppl__02.pdf]
